# Supplementary material for: RNA silencing is required for Arabidopsis defence against Verticillium wilt disease
Source: PubMed Central journal article supplement — J Exp Bot. 2008 Dec 19;60(2):591–602. doi: 10.1093/jxb/ern306 (PMC2651451; doi:10.1093/jxb/ern306), 2008-12-19
Supplement: ern306_1.pdf [file ern306_1.pdf]

**Supplemental data Ellendorff et al.: RNA silencing is required for Arabidopsis defense against *Verticillium* wilt disease**

**Table S1.** Conditional phenotype assays for *sgs1-1*, *sgs2-1* and *sgs3-1* mutants.

**Figure S1.** Typical symptoms of Arabidopsis *sgs2-1* mutants upon inoculation with plant pathogenic *Verticillium* species.

**Figure S2.** Quantification of symptom development at 20 days post inoculation shown as ratio of diseased rosette leaves with standard deviation.

**Fig. S3.** Salicylic acid-induced *PR-1* expression in Arabidopsis gene silencing mutants.

**Table S1.** Conditional phenotype assays for *sgs1-1*, *sgs2-1* and *sgs3-1* mutants

| Pathogens               |                                                |                         |                             |
|-------------------------|------------------------------------------------|-------------------------|-----------------------------|
| Kingdom                 | Pathogen Species                               | Strain                  | Concentration               |
| fungi                   | <i>Alternaria brassicicola</i>                 | MUCL20297               | 10 <sup>6</sup> spores/mL   |
|                         | <i>Botrytis cinerea</i>                        | (Brouwer et al., 2003)  | 10 <sup>6</sup> spores/mL   |
|                         | <i>Fusarium oxysporum</i> f.sp. <i>raphani</i> | 815                     | 10 <sup>6</sup> budcells/mL |
|                         | <i>Plectosphaerella cucumerina</i>             | (Thomma et al., 2000)   | 10 <sup>6</sup> spores/mL   |
|                         | <i>Verticillium albo-atrum</i>                 | VA1 <sup>b)</sup>       | 10 <sup>6</sup> spores/mL   |
|                         |                                                | CBS451.88 <sup>b)</sup> | 10 <sup>6</sup> spores/mL   |
|                         | <i>Verticillium dahliae</i>                    | JR2                     | 10 <sup>6</sup> spores/mL   |
|                         |                                                | St12.01 <sup>b)</sup>   | 10 <sup>6</sup> spores/mL   |
|                         | <i>Verticillium longisporum</i>                | VI 43 <sup>b)</sup>     | 10 <sup>6</sup> spores/mL   |
| bacteria                | <i>Pseudomonas syringae</i> pv. <i>tomato</i>  | DC3000                  | OD 0.3                      |
|                         | <i>Pst AvrRpm1</i> <sup>a)</sup>               | DC3000                  | OD 0.3                      |
|                         | <i>Pst AvrRpt2</i> <sup>a)</sup>               | DC3000                  | OD 0.3                      |
|                         | <i>Pst AvrRps4</i> <sup>a)</sup>               | DC3000                  | OD 0.3                      |
| Hormones                |                                                |                         |                             |
| Hormones                | Agents                                         | Hormone Assay           | Hypocotyl Alteration        |
| auxin                   | 2,4-D: 2,4-dichlorophenoxy acetic acid         | 0,1 µM<br>1 µM          | 5 µM                        |
| cytokinin               | 6-BA: 6-benzylaminopurine                      | 1 µM                    |                             |
| gibberellic acid        | GA: gibberellic acid                           | 1µM<br>20 µM            | 20 µM                       |
| ethylene                | ACC: 1-aminocyclopropane-1-carboxylic acid     | 1 µM                    | 0,5 µM<br>10 µM             |
| brassinolide            | EBL: epibrassinolide                           | 1 µM                    | 1 µM                        |
| jasmonate               | MeJA: methyl-jasmonate                         | 1 µM                    |                             |
| abscisic acid           | ABA: abscisic acid                             | 0,5 µM                  |                             |
| Abiotic Stress          |                                                |                         |                             |
| Stress Types            | Agents                                         | Concentration           |                             |
| salt stress             | sodium chloride                                | 100 mM                  |                             |
|                         |                                                | 150 mM                  |                             |
|                         | lithium chloride                               | 20 mM                   |                             |
|                         |                                                | 30 mM                   |                             |
| osmotic stress          | mannitol                                       | 150 mM                  |                             |
|                         |                                                | 200 mM                  |                             |
| reactive oxygen species | hydrogen peroxide                              | 3.3 mM                  |                             |
|                         |                                                | 6.7 mM                  |                             |
|                         |                                                | 2.0 µM                  |                             |
| heavy metal             | paraquat                                       | 2.0 µM                  |                             |
|                         | cadmium chloride                               | 85 µM                   |                             |

a) *Pst*, *Pseudomonas syringae* pv. *tomato*.

b) These pathogens were only used on *sgs2-1* and Col-0 plants.

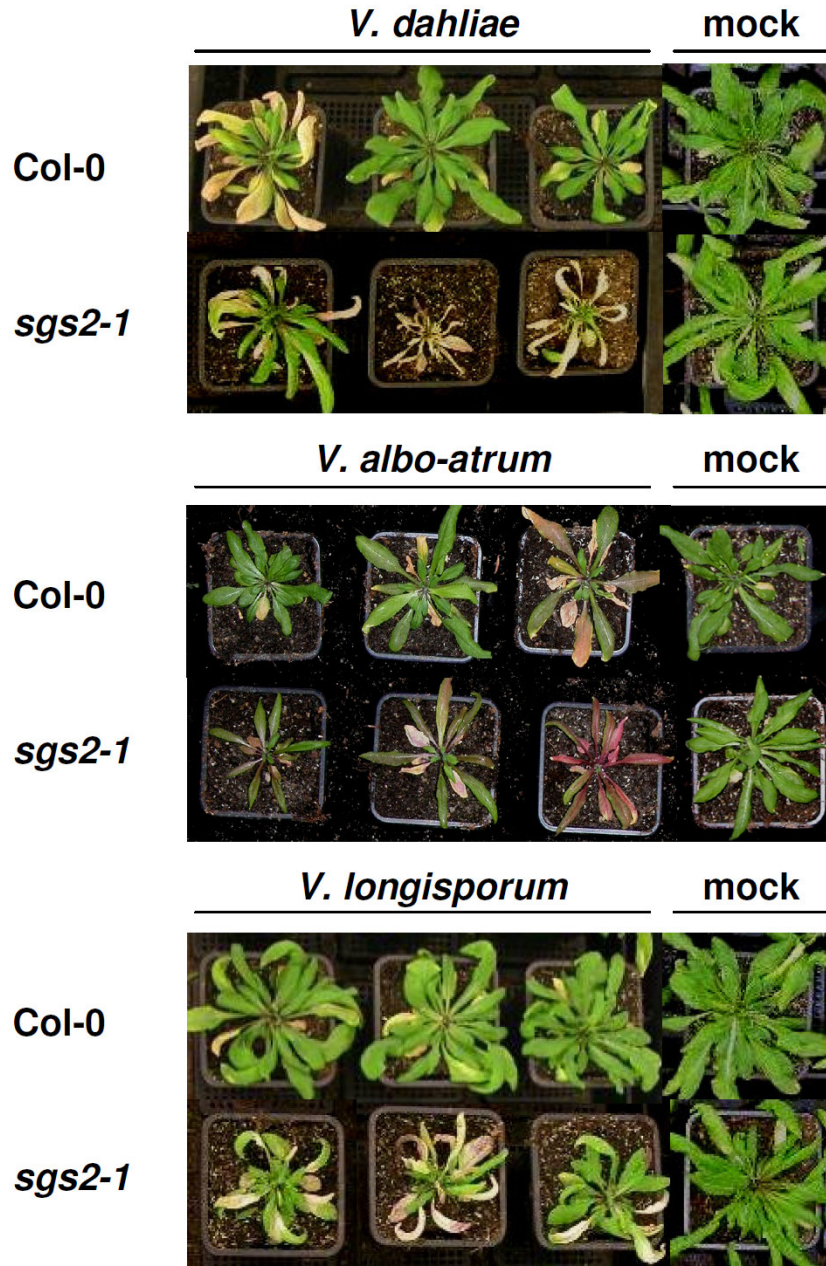

**Figure S1.** Typical symptoms of *Arabidopsis sgs2-1* mutants upon inoculation with plant pathogenic *Verticillium* species. The mutant *sgs2-1* and the corresponding wild type (Col-0) were inoculated with *V. dahliae* strain ST12.01 (A), *V. albo-atrum* strain CBS451.88 (B), and *V. longisporum* strain VI43 (C). The *Verticillium*-inoculated *sgs2-1* mutant shows enhanced symptom development upon inoculation with any of these *Verticillium* strains, including more severe stunting, wilting, anthocyanin accumulation and tissue necrosis, when compared with Col-0 plants at three weeks post inoculation.

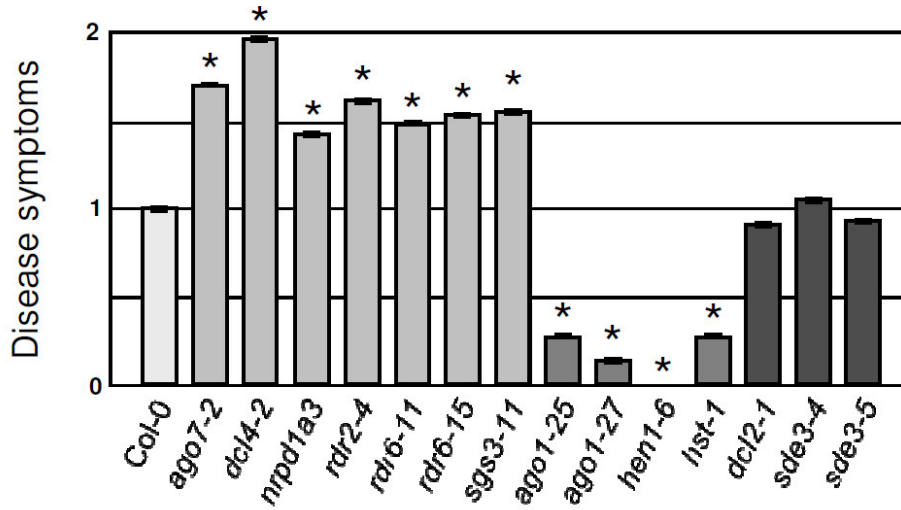

**Figure S2.** Quantification of symptom development at 20 days post inoculation shown as ratio of diseased rosette leaves with standard deviation. The ratio of diseased rosette leaves for Col-0 is set to one. Asterisks indicate significant differences when compared with the wild type Col-0 ( $P < 0.05$ ).

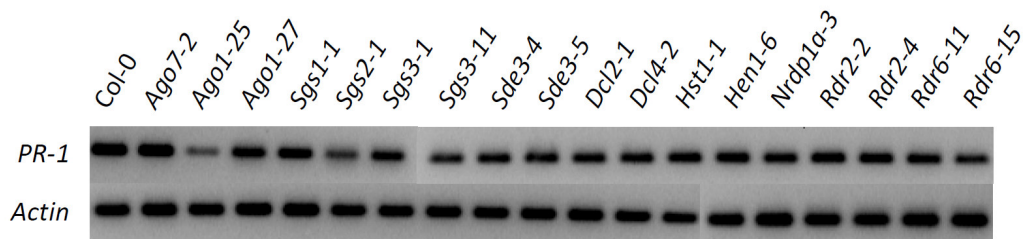

**Fig. S3.** Salicylic acid-induced *PR-1* expression in Arabidopsis gene silencing mutants. Wild type Columbia-0 (Col-0) and gene silencing mutants were treated with 2 mM salicylic acid and *PR-1* expression was analyzed with reverse transcription PCR after 24 hours. Equal loading of cDNA samples was verified by amplification of actin transcripts.
